# Supplementary material for: A simple monochromatic flow cytometric assay for assessment of intraerythrocytic development of Plasmodium falciparum
Source: Springer Nature journal article supplement (doi:10.1186/s12936-020-03156-1), 2020-02-18
Supplement: MOESM2 [file 17720202]

Early and mature  
schizonts

Early  
gametocytes

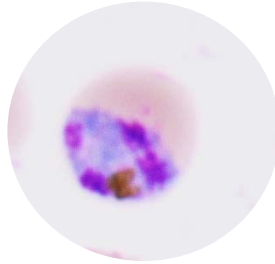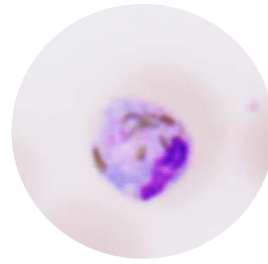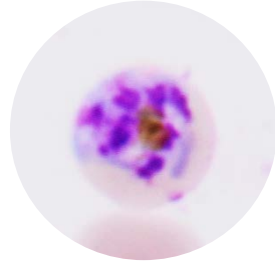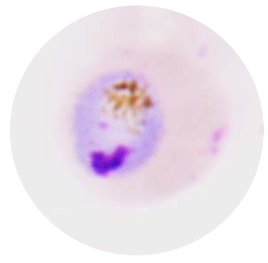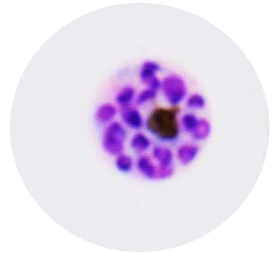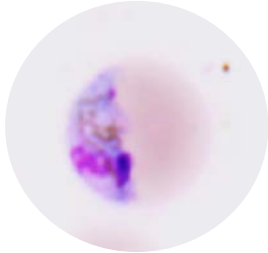

Stage IB

Stage II

10  $\mu\text{m}$
